# Supplementary material
Source: PubMed Central journal article supplement (PMC4252517)
Supplement: NIHMS623761-supplement-References.pdf [file NIHMS623761-supplement-References.pdf]

## References

- Agosti, V., Levin, F. R., 2007. Predictors of cannabis dependency recovery among epidemiological survey respondents in the United States. *Am. J. Drug Alcohol Abuse*, 33, 81-88.
- Aitken, S.S., Desantis, J., Harford, T. C., Fe Caces, M., 2000. Marijuana use among adults: A longitudinal study of current and former users. *J. Subst. Abuse*, 12, 213-226.
- Akers, R.L., 1985. *Deviant Behavior: A Social Learning Approach*. Wadsworth Press, Belmont.
- Allison, K.W., Crawford, I., Leone, P.E., Trickett, E. Perez-Febles, A. Burton, L. M., Le Blanc, R., 1999. Adolescent substance use: Preliminary examinations of school and neighborhood context. *Am. J. Clinical Path.*, 27, 111-141.
- Bailey, S. L., Flewelling, R. L., Rachal, J. V., 1992. Predicting continued use of marijuana among adolescents: The relative influence of drug-specific and social context factors. *Journal of Health and Social Behavior*, 33, 51-65.
- Brook, J.S., Nomura, C., Cohen, P., 1989. A network of influences on adolescent drug involvement: Neighborhood, school, peer, and family. *Genetic, Social, and General Psychology Monographs*, 115: 125-145.
- Brook, J. S., Zhang, C., Brook, D.W., 2011. Antisocial behavior at age 37: Developmental trajectories of marijuana use extending from adolescence to adulthood. *American Journal on Addictions*, 20, 509-515.
- Bryan, A. D., Schmiege, S. J., Magnan, R.E., 2012. Marijuana use and risky sexual behavior among high-risk adolescents: Trajectories, risk factors, and event-level relationships. *Developmental Psychology*, 48, 1429-1442.

- Burlew, A.K., Johnson, C.S., Flowers, A.M., Peteet, B.J., Griffith-Henry, K.D., Buchanan, N.D., 2009. Neighborhood risk, parental supervision and the onset of substance use among African American adolescents. *Journal of Family Studies*, 18, 680-689.
- Buu, A., DiPiazza, C., Wang, J., Puttler, L. I., Fitzgerald, H. E., Zucker, R.A., 2009. Parent, family, and neighborhood effects on the development of child substance use and other psychopathology from preschool to the start of adulthood. *Journal of Study of Alcohol and Drugs*, 70, 489-498.
- Chantala, K., Tabor, J., 1999. Strategies to perform a design-based analysis using the Add Health Data. University of North Carolina at Chapel Hill.
- Chassin, L., Dmitrieva, J., Modecki, K., Steinberg, L., Cauffman, E., Piquero, A. R., Knight, G. P., Losoya, S.H., 2010. Does adolescent alcohol and marijuana use predict suppressed growth in psychosocial maturity among male juvenile offenders? *Psychology of Addictive Behaviors*, 24, 48-60.
- Chen, K., Kandel, D.B., 1998. Predictors of cessation of marijuana use: An event history analysis. *Drug and Alcohol Dependence*, 50, 109-121.
- Choi, Y., Harachi, T.W., Catalano, R.F., 2006. Neighborhoods, family, and substance use: Comparisons of the relations across racial and ethnic groups. *Social Services Review*, 80, 675-704.
- Chuang, Y., Ennett, S.T., Bauman, K.E., Foshee, V.A., 2005. Neighborhood influences on adolescent cigarette and alcohol use: Mediating effects through parent and peer behaviors. *Journal of Health and Social Behavior* 46, 187-204.
- Cobb, N. K., Graham, A. L., Abrams, D.B., 2010. Social network structure of a large online community for smoking cessation. *American Journal of Public Health* 100, 1282-1289.

- de la Haye, K., Green., H. D., Kennedy, D. P., Pollard, M. S., Tucker, J.S., 2013. Selection and influence mechanisms associated with marijuana initiation and use in adolescent friendship networks. *Journal of Research on Adolescence* 23, 474-486.
- DeWit, D.J., 1998. Frequent childhood geographic relations: Its impact on drug use initiation and the development of alcohol and other drug-related problems among adolescents and young adults. *Addictive Behaviors*, 23, 623-634.
- Dishion, T. J. Loeber, R., 1985. Adolescent marijuana and alcohol use: The role of parents and peers revisited. *American Journal of Drug and Alcohol Abuse*, 11, 11-25.
- Ellickson, P. L., Martino, S. C., Collins, R.L., 2004. Marijuana use from adolescence to young adulthood: Multiple developmental trajectories and their associated outcomes. *Health Psychology*, 23, 299-307.
- Fagan, A.A., Wright, E.M., Pinchevsky, G.M., 2013. Racial/ethnic differences in the relationships between neighborhood disadvantage and adolescent substance use. *Journal of Drug Issues* 43: 69-84.
- Furr-Holden, C. D., Lee, M. H., Milam, A. J., Johnson, R. M., Lee, K., Ialongo, N.S., 2011. The growth of neighborhood disorder and marijuana use among urban adolescents: A case for policy and environmental interventions. *Journal of Study of Alcohol and Drugs*, 72, 371-379.
- Hammer, T., Vaglum, P., 1990. Initiation, continuation or discontinuation of cannabis use in the general population. *British Journal of Addiction*, 85, 899-909.
- Harris, K.M., Halpern, C.T., Entzel, P., Tabor, J., Bearman, P.S., Udry, J.R., 2009. The National Longitudinal Study of Adolescent Health: Research design.  
<http://www.cpc.unc.edu/projects/addhealth/design>. Accessed on January 8, 2012.

- Haynie, D.L., Silver, E., Teasdale, B., 2006. Neighborhood characteristics, peer networks, and adolescent violence. *Journal of Quantitative Criminology*, 22, 147-169.
- Hoffman, J.P., 1995. The effects of family structure and family relations on adolescent marijuana use. *The International Journal of the Addictions*, 30, 1207-1241.
- Hoffman, J.P., 2002. The community context of family structure and adolescent drug use. *Journal of Marriage and Family*, 64, 314-330.
- Hughes, J. R., Peters, E. N., Callas, P. W., Budney, A. J., Livingstone, A.E., 2008. Attempts to stop or reduce marijuana use in non-treatment seekers. *Drug and Alcohol Dependence*, 97, 180-184.
- Johnston, L. D., O'Malley, P. M., Miech, R.A., Bachman, J. G., Schulenberg, J.E., 2014. *Monitoring the Future: National results on drug use: 1975-2013: Overview, key findings on adolescent drug use*. Ann Arbor: Institute for Social Research, The University of Michigan.
- Juon, H-S., Fothergill, K. E., Green, K. M., Doherty, E. E., Ensminger, M.E., 2011. Antecedents and consequences of marijuana use trajectories over the life course in an African American population. *Drug and Alcohol Dependence*, 118, 216-223.
- Kandel, D. B., Raveis, V.H., 1989. Cessation of illicit drug use in young adulthood. *Archives of General Psychiatry*, 46, 109-116.
- Lawhon, D., Humfleet, G. L., Hall, S. M., Reus, V. I., Muñoz, R.F., 2009. Longitudinal analysis of abstinence-specific social support and smoking cessation. *Health Psychology* 28, 465-472.
- Lynskey, M., Hall, W., 2000. The effects of adolescent cannabis use on educational attainment: a review. *Addiction*, 95, 1621-1630.

- Mermelstein, R., Cohen, S., Lichtenstein, E., Baer, J. S., Karmark, T., 1986. Social support and smoking cessation and maintenance. *Journal of Consulting and Clinical Psychology* 54: 447-453.
- Pasta, D., J., Suhr, D., 2004. Creating scales from questionnaires: PROC VARCLUS vs. Factor Analysis. SUGI 29 Proceedings, Paper 205-29.
- Shaw, C.R., McKay, H., 1942. *Juvenile Delinquency in Urban Areas*. Chicago, IL: University of Chicago Press.
- Smart, R.G., Adlaf, E.M., Walsh, G.W., 1994. Neighbourhood socio-economic factors in relation to student drug use and programs. *Journal of Child Adolescent Substance Abuse*, 3, 37-46.
- Smith, D.C., Cleeland, L., Dennis, M.L., 2010. Reasons for quitting among emerging adults and adolescents in substance-use-disorder treatment. *Journal of Studies on Alcohol and Drugs*, 71, 400-409.
- Snedker, K.A., Herting, J.R., Walton, E., 2009. Contextual effects and adolescent substance use: Exploring the role of neighborhoods. *Social Science Quarterly*, 90, 1272-1297.
- Song, E-Y, Reboussin, B.A., Foley, K.L., Kaltenbach, L.A., Wagoner, K.G., Wolfson, M., 2009. Selected community characteristics and underage drinking. *Substance Use and Misuse*, 44, 179-194.
- Supple, A.J., Aquilino, W.S., Wright, D.L., 1999. Collecting Sensitive Self-Report Data with Laptop Computers: Impact on the Response Tendencies of Adolescents in a Home Interview. *Journal of Research on Adolescence*, 9, 467-488.
- Sussman, S., Dent, C.W., 1999. One-year prospective prediction of marijuana use cessation among youth at continuation high schools. *Addictive Behaviors*, 24, 411-417.

- Sussman, S., Dent, C.W., 2004. Five-year prospective prediction of marijuana use cessation of youth at continuation high schools. *Addictive Behaviors*, 29, 1237-1243.
- Theall, K.P., Sterk, C.E., Elifson, K.W., 2009. Perceived neighborhood fear and drug use among young adults. *American Journal of Health Behavior*, 33, 353-365.
- Tomlin, A.M., 1998. Grandparents' Influence on Grandchildren. In M. E. Szinovacz (Ed.), *Handbook on Grandparenthood* (pp. 159-170). Westport, CT: Greenwood Press.
- Tucker, J. S., Ellickson, P. L., Collins, R. L., Klein, D.J., 2006. Are drug experimenters better adjusted than abstainers and users? A longitudinal study of adolescent marijuana use. *Journal of Adolescent Health*, 39, 488-494.
- Tucker, J.S., de la Haye, K, Kennedy, D.P., Green, H.D., and Pollard, M.S., 2014. Peer influence on marijuana use in different types of friendships. *Journal of Adolescent Health*, 54, 67-73.
- Tucker, J.S., Pollard, M.S., de la Haye, K., Kennedy, D.P., Green, H.D., 2013. Neighborhood characteristics and the initiation of marijuana use and binge drinking. *Drug and Alcohol Dependence*, 128, 83-89.
- Turner, C.F., Ku, L., Rogers, S.M., Lindberg, L.D., Pleck, J.H., Sonenstein, F.L., 1998. Adolescent sexual behavior, drug use, and violence: Increased reporting with computer survey technology. *Science*, 280, 867-873.
- Washburn, I.J., Capaldi, D.M., 2014. Influences on boys' marijuana use in high school: A two-part random intercept growth model. *Journal of Research on Adolescence*, 24, 117-130.
- Windle, M., Wiesner, M., 2004. Trajectories of marijuana use from adolescence to young adulthood: Predictors and outcomes. *Development and Psychopathology*, 16, 1007-1027.

Yamaguchi, K., Kandel, D.B., 1985. On the resolution of role incompatibility: A life event history analysis of family roles and marijuana use. *American Journal of Sociology*, 90, 1284-1325.

Zimmerman, G.M., Messner, S.F., 2010. Neighborhood context and the gender gap in adolescent violent crime. *American Sociological Review*, 75, 958-980.
